# Supplementary material for: Cu–Mn bimetallic catalyst for Huisgen [3+2]-cycloaddition
Source: Royal Society of Chemistry journal article supplement (doi:10.1039/c005088a), 2010-01-01

## Supporting information

### **Cu–Mn bimetallic catalyst for Huisgen [3+2]-cycloaddition.**

Syed Khalid Yousuf , Debaraj Mukherjee<sup>a\*</sup>, Baldev Singh , Sudip Maity and Subhash Chandra Taneja

*Green Chem.*, 2010, 12, 1568-1572 (DOI: 10.1039/C005088A) Communication .

<sup>1</sup>H NMR of the selected compounds.

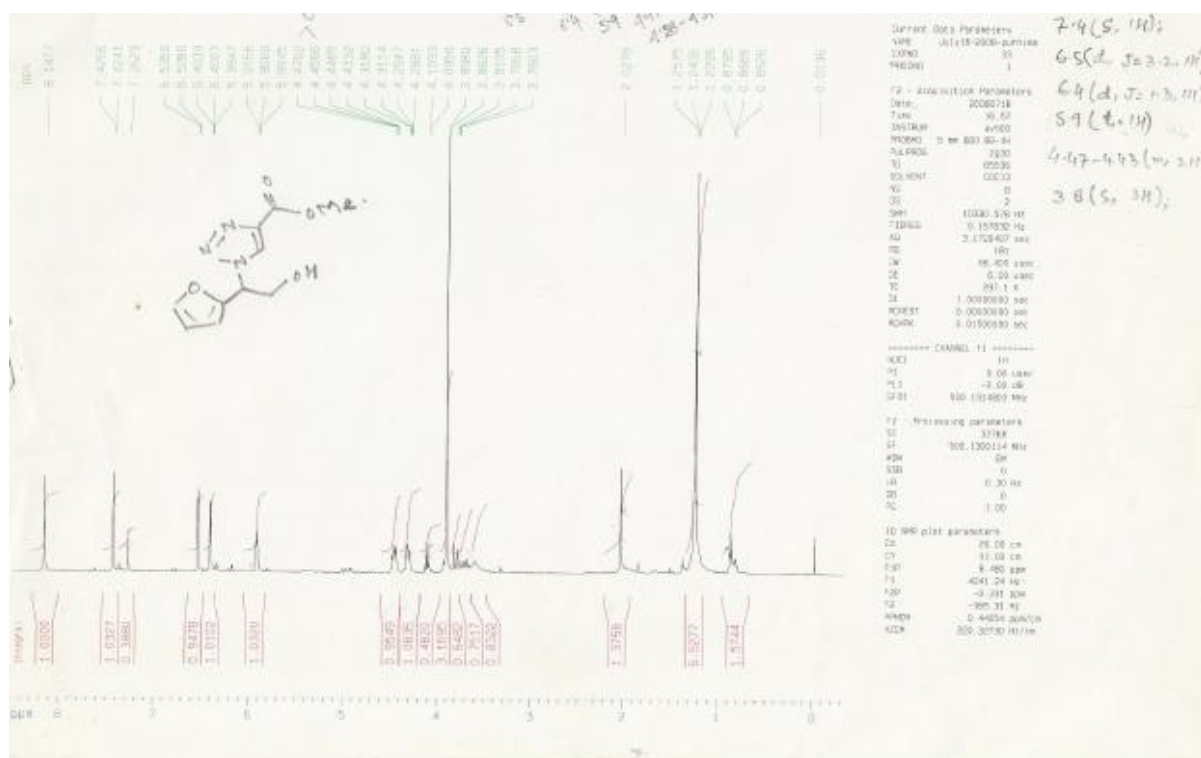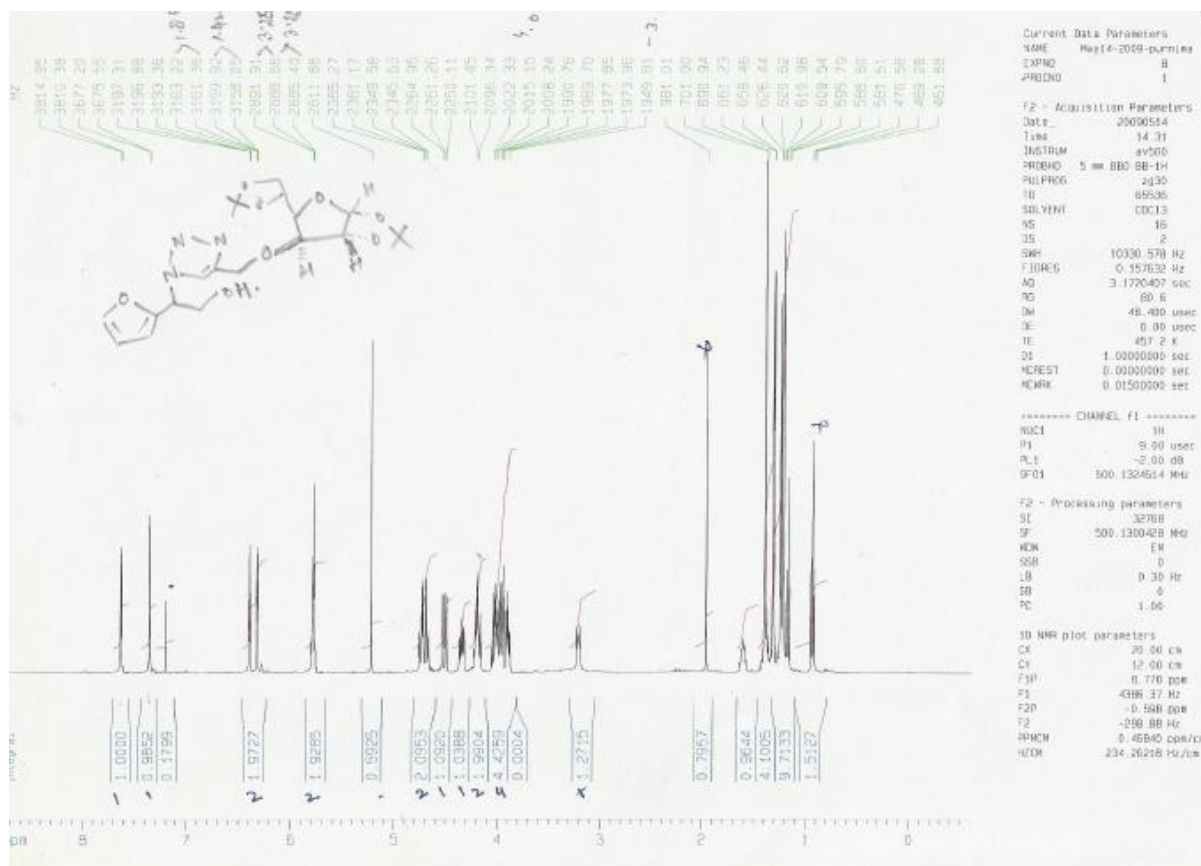

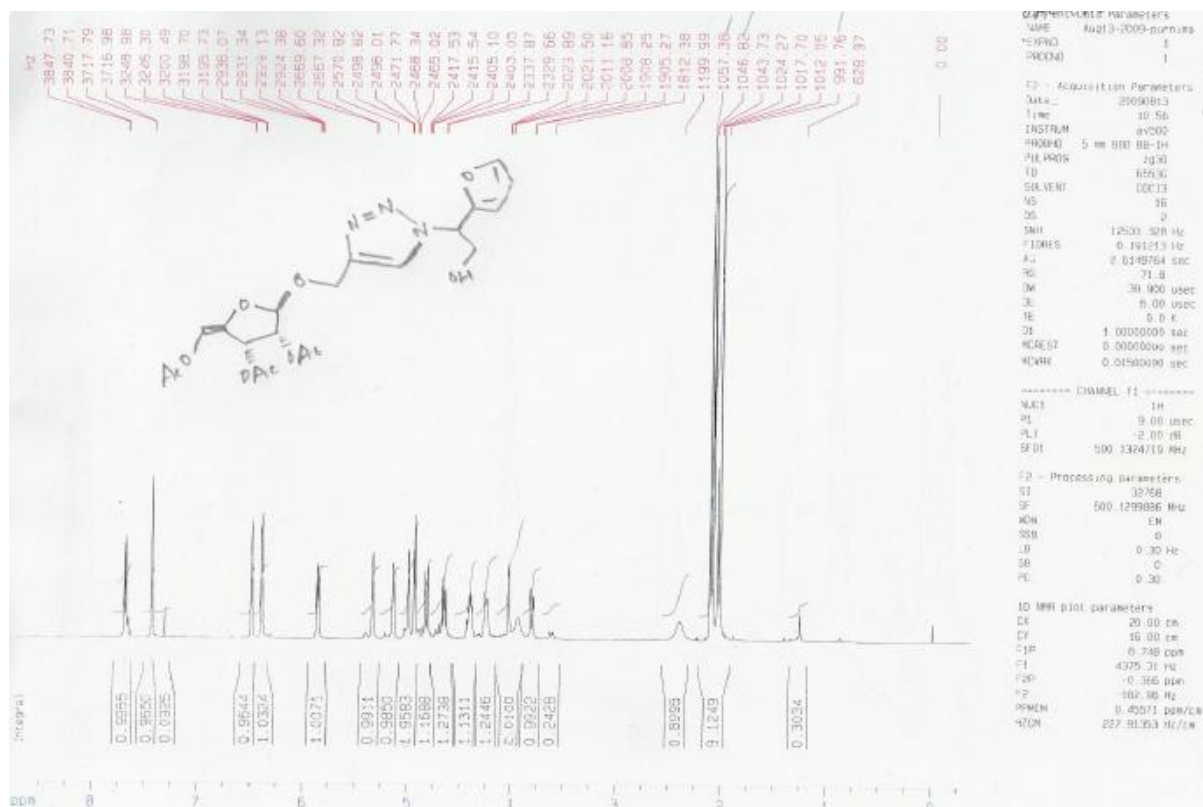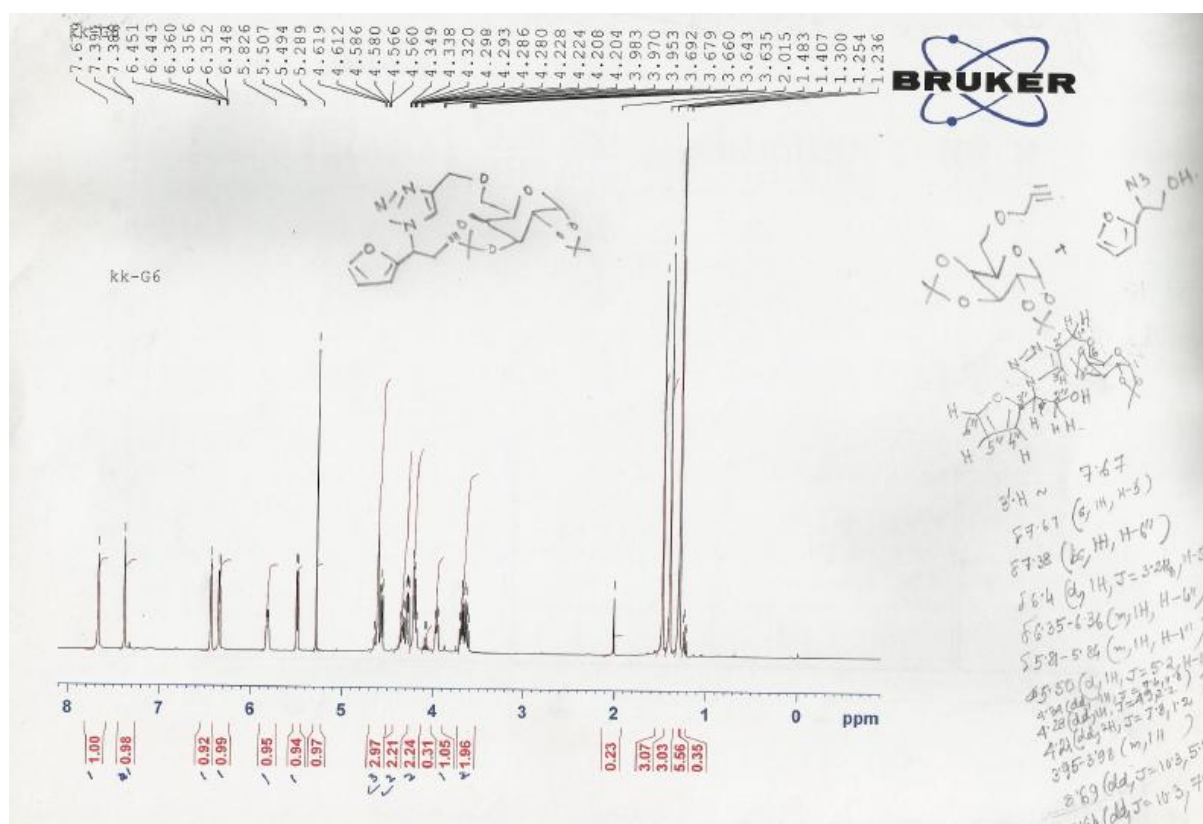

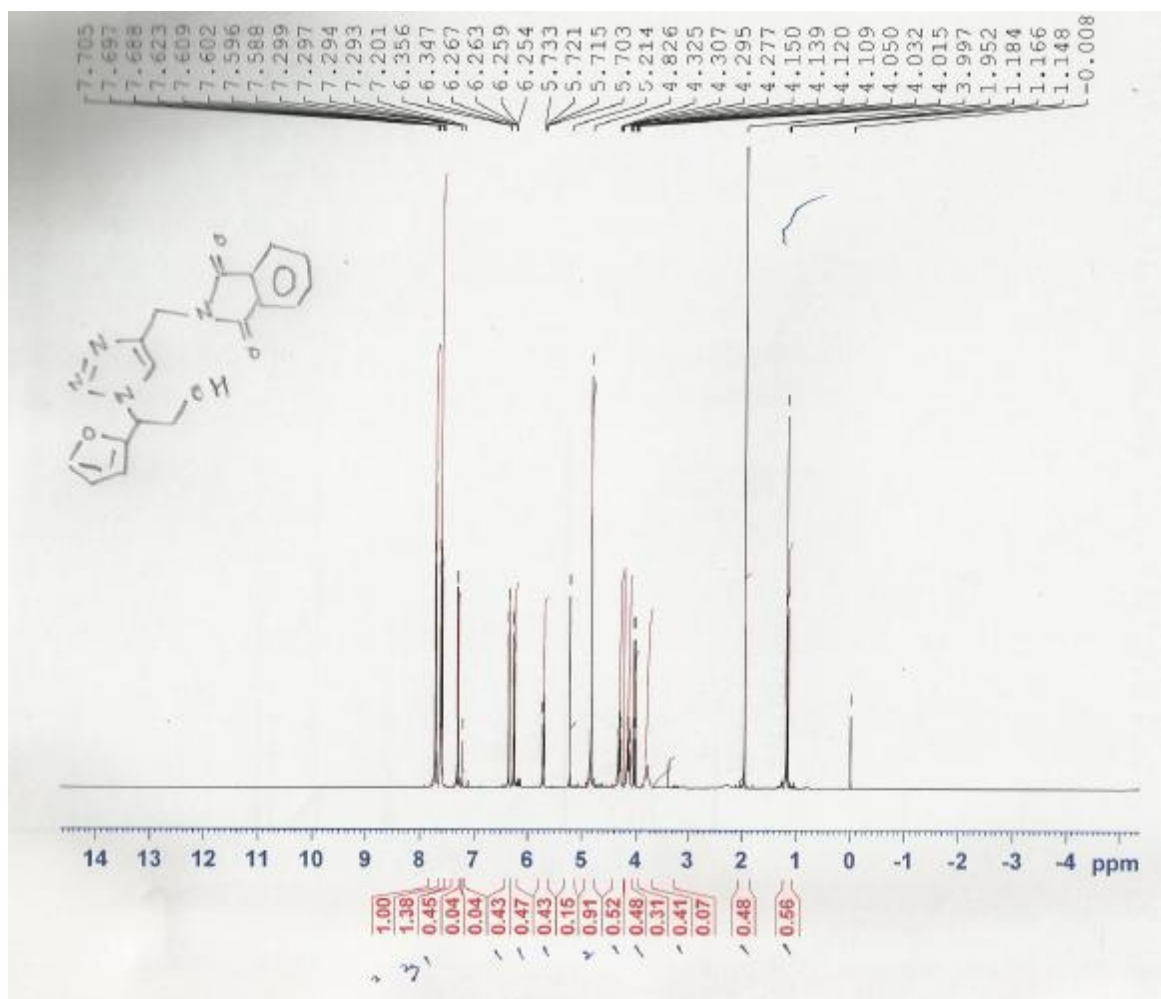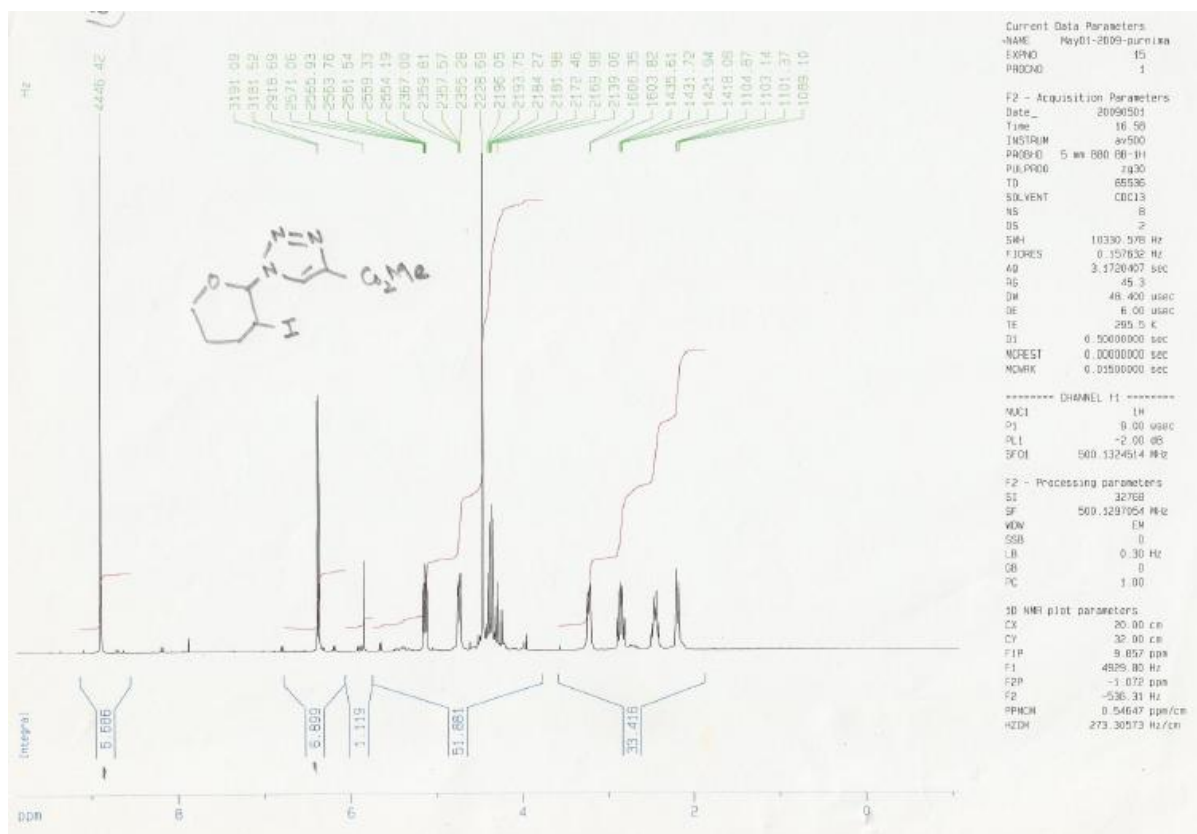

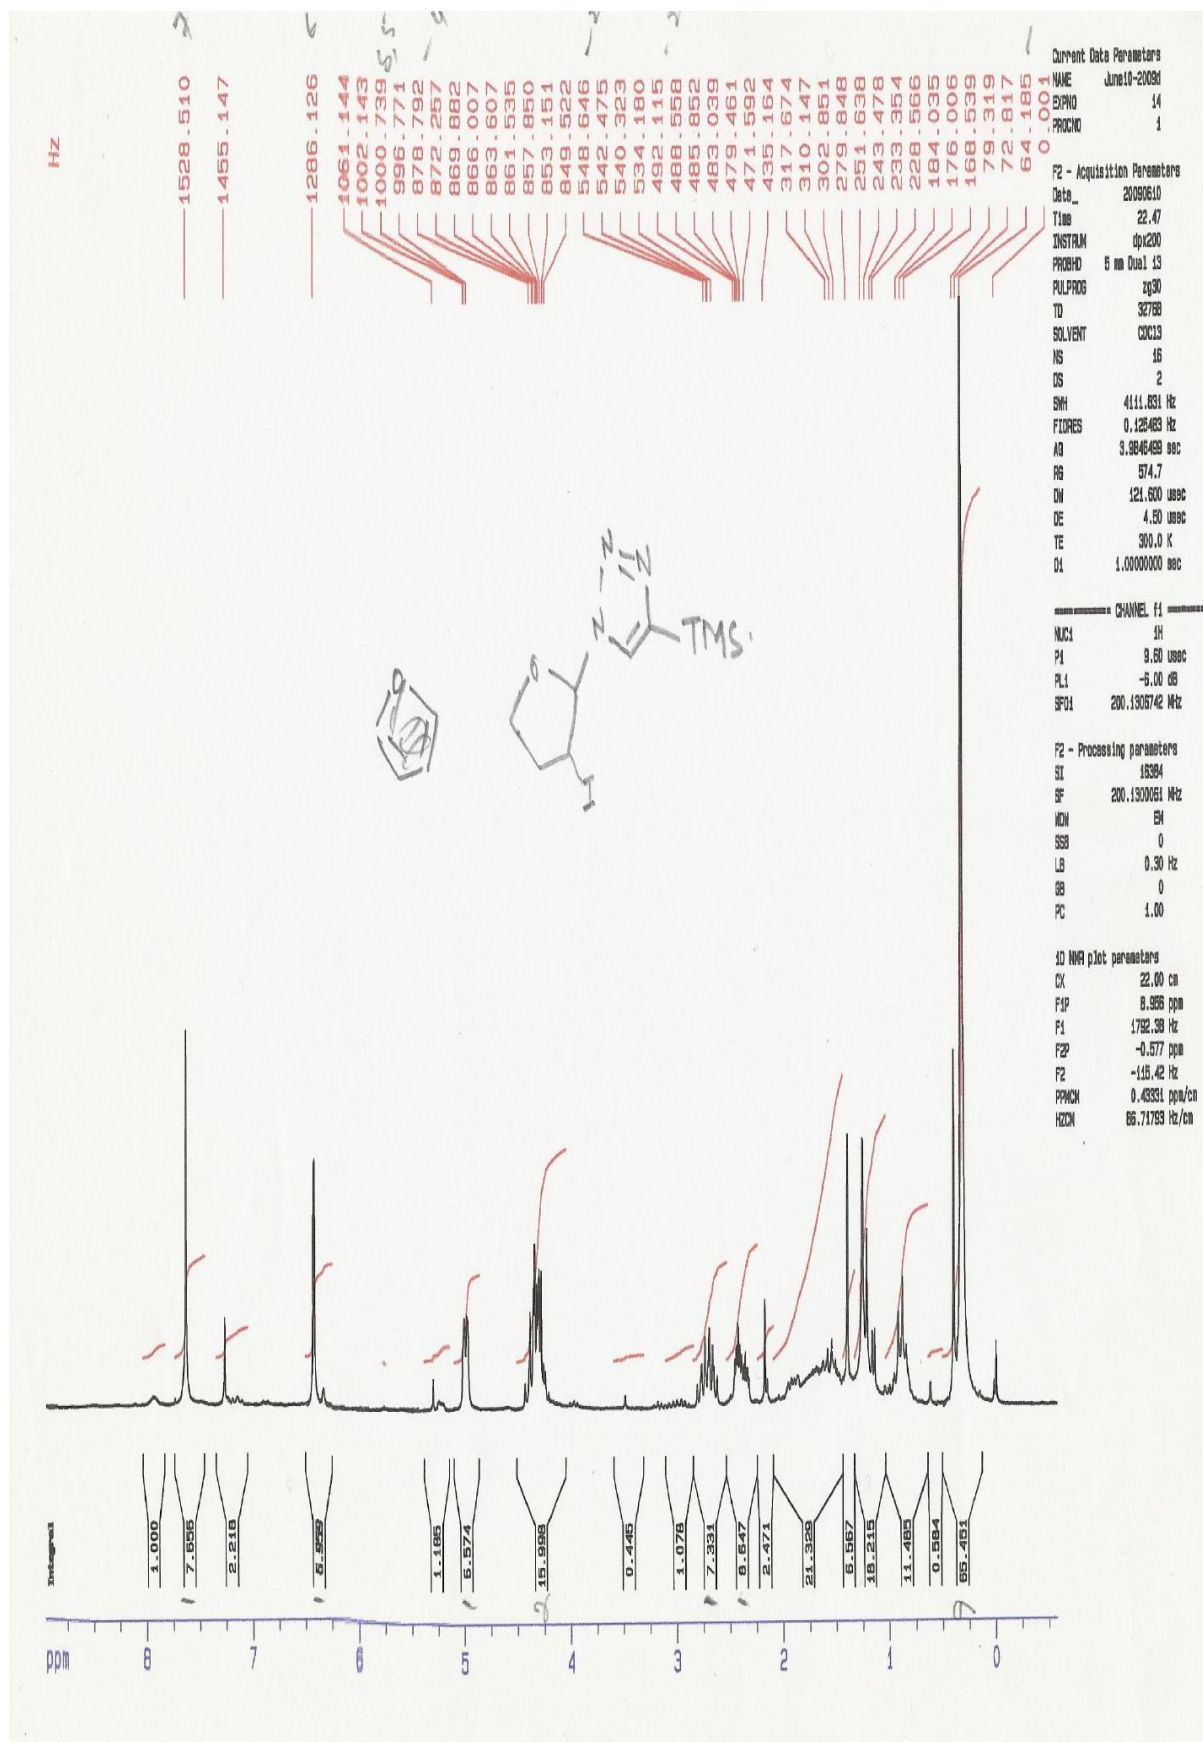



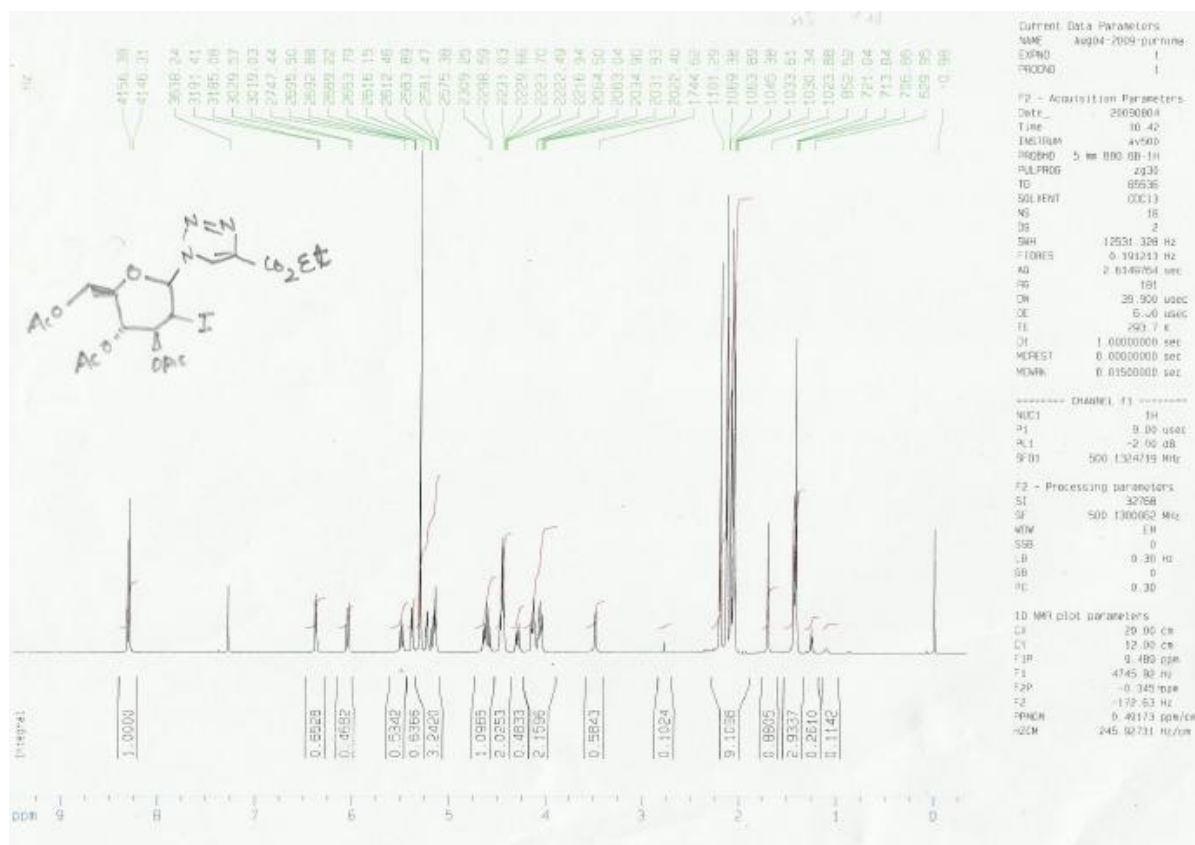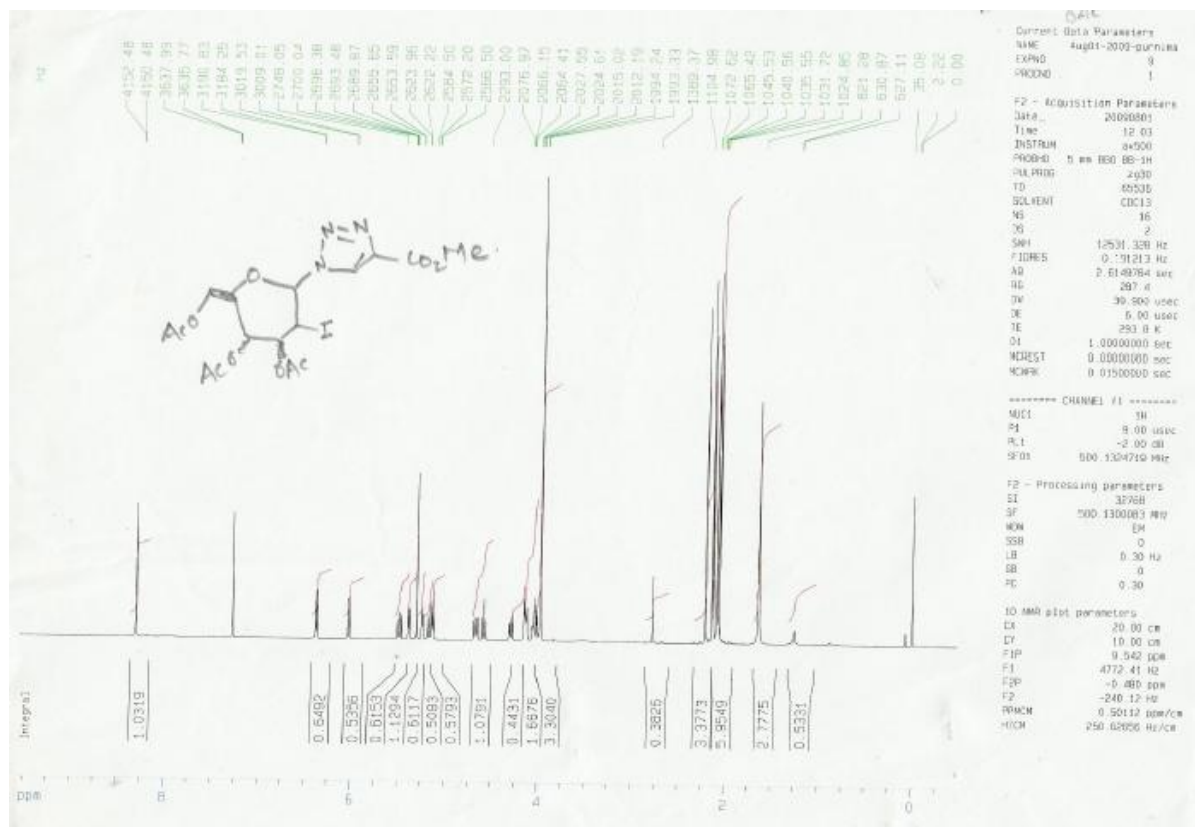

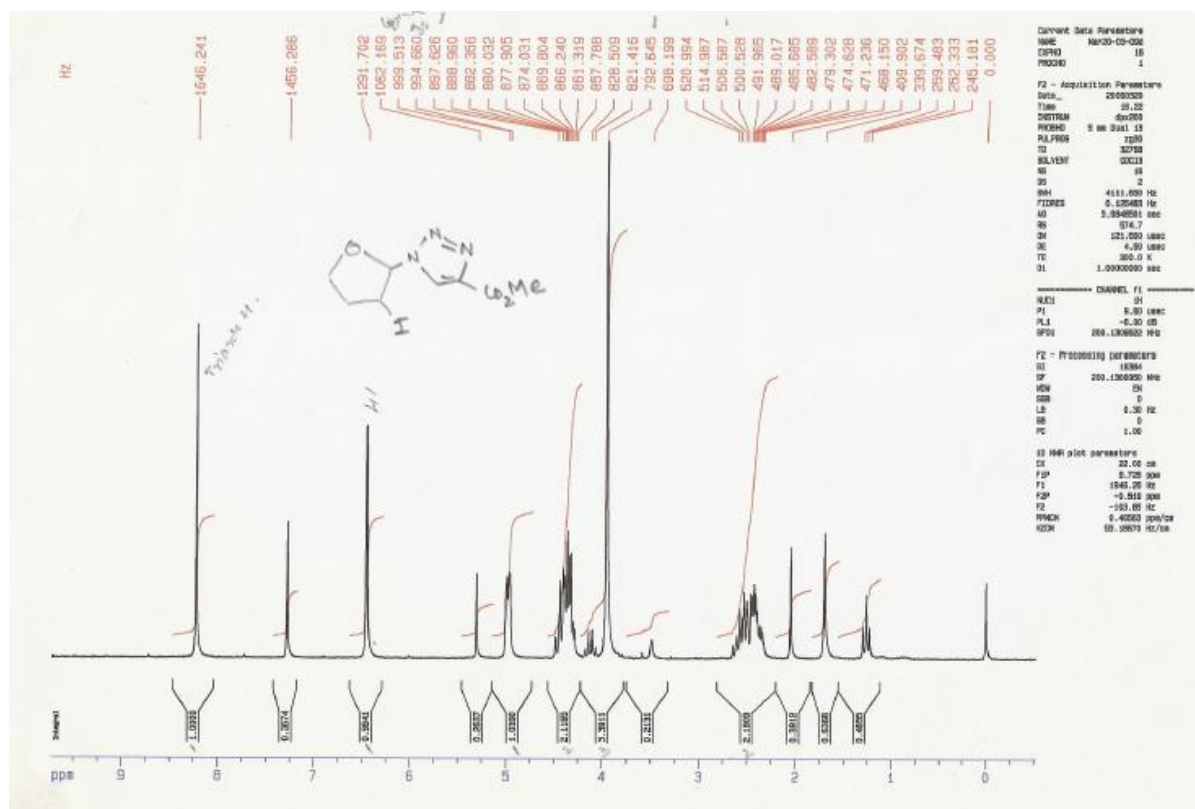

Supplement: c005088a.pdf [file c005088a.pdf]
